# Supplementary material
Source: ML conference proceedings conference paper supplement (https://proceedings.mlr.press/v28/menon13a.html)
Supplement: Supplementary file 1 [file menon13a-supp.pdf]

## Supplementary Material

### Proof of Lemma 4

The proof uses the following result of (Scott, 2012):

**Lemma 8** ((Scott, 2012)). *Let  $c \in (0, 1)$ . For any  $h : \mathcal{X} \rightarrow \{\pm 1\}$ ,*

$$\text{regret}_D^{0-1, (c)}[h] = \mathbf{E}_x[|\eta(x) - c| \cdot \mathbf{1}(h(x) \neq \text{sign}(\eta(x) - c))].$$

*Proof of Lemma 4.* The proof follows from Lemma 8 by a straightforward application of Jensen's inequality. In particular, we have,

$$\begin{aligned} \text{regret}_D^{0-1, (c)}[h] &\leq \mathbf{E}_x \left[ |\eta(x) - c| \cdot \mathbf{1}((\widehat{\eta}(x) - c)(\eta(x) - c) \leq 0) \right], \\ &\quad \text{by Lemma 8 and definition of } h \\ &\leq \mathbf{E}_x \left[ |\widehat{\eta}(x) - \eta(x)| \right], \\ &\quad \text{since } (\widehat{\eta}(x) - c)(\eta(x) - c) \leq 0 \implies \\ &\quad \quad |\eta(x) - c| \leq |\widehat{\eta}(x) - \eta(x)| \\ &= \left( \mathbf{E}_x \left[ |\widehat{\eta}(x) - \eta(x)|^r \right] \right)^{1/r} \\ &\leq \left( \mathbf{E}_x \left[ |\widehat{\eta}(x) - \eta(x)|^r \right] \right)^{1/r}, \end{aligned}$$

where the last inequality follows by convexity of the function  $g(z) = z^r$  ( $r \geq 1$ ) and Jensen's inequality.  $\square$

### Proof of Theorem 5

*Proof.* Let  $\gamma : \{\pm 1\} \times [0, 1] \rightarrow \bar{\mathbb{R}}_+$  be an underlying strongly proper loss such that

$$\ell(y, f) = \gamma(y, \psi^{-1}(f)).$$

Then we have,

$$\begin{aligned} &\mathbf{E}_x \left[ (\widehat{\eta}_S(x) - \eta(x))^2 \right] \\ &= \mathbf{E}_x \left[ (\psi^{-1}(f_S(x)) - \eta(x))^2 \right], \\ &\quad \text{by definition of } \widehat{\eta}_S \text{ (see Algorithm 1)} \\ &\leq \frac{1}{\kappa} \mathbf{E}_x \left[ L_\gamma(\eta(x), \psi^{-1}(f_S(x))) - H_\gamma(\eta(x)) \right], \\ &\quad \text{for some } \kappa > 0, \text{ by strong properness of } \gamma \\ &= \frac{1}{\kappa} \mathbf{E}_x \left[ L_\ell(\eta(x), f_S(x)) - H_\ell(\eta(x)) \right], \\ &\quad \text{since } L_\ell(\eta, f) = L_\gamma(\eta, \psi^{-1}(f)) \text{ and} \\ &\quad \text{since } H_\ell(\eta) = H_\gamma(\eta) \text{ (easy to verify)} \\ &= \frac{1}{\kappa} \text{regret}_D^\ell[f_S]. \end{aligned}$$

Thus, if  $K$  and  $\lambda_n$  can be chosen such that  $\text{regret}_D^\ell[f_S] \xrightarrow{P} 0$ , then  $\mathbf{E}_x \left[ (\widehat{\eta}_S(x) - \eta(x))^2 \right] \xrightarrow{P} 0$ . The result then follows from Theorem 3.  $\square$

### Proof of Lemma 7

We will need the following results of (Scott, 2012):

**Lemma 9** ((Scott, 2012)). *Let  $\ell : \{\pm 1\} \times \bar{\mathbb{R}} \rightarrow \bar{\mathbb{R}}_+$  be any loss and let  $c \in (0, 1)$ . Let  $w_c : [0, 1] \rightarrow (0, 1)$  be defined as*

$$w_c(\eta) = \eta(1 - c) + (1 - \eta)c.$$

*Then for any  $\eta \in [0, 1]$  and  $f \in \bar{\mathbb{R}}$ ,*

$$L_\ell^{(c)}(\eta, f) = w_c(\eta) \cdot L_\ell \left( \frac{\eta(1 - c)}{w_c(\eta)}, f \right).$$

**Lemma 10** ((Scott, 2012)). *Let  $\ell : \{\pm 1\} \times \bar{\mathbb{R}} \rightarrow \bar{\mathbb{R}}_+$  be classification-calibrated at  $\frac{1}{2}$  and let  $c \in (0, 1)$ . Then  $\ell^{(c)}$  is classification-calibrated at  $c$ .*

*Proof of Lemma 7.* We first show that under the given condition on  $\ell$ , we have  $\forall \eta \in [0, 1]$ ,

$$L_\ell^{(c)}(\eta, 0) - H_\ell^{(c)}(\eta) \geq \frac{\alpha}{2^r} |\eta - c|^r. \quad (3)$$

To see this, note that for any  $\eta \in [0, 1]$ ,

$$\begin{aligned} &L_\ell^{(c)}(\eta, 0) - H_\ell^{(c)}(\eta) \\ &= w_c(\eta) \cdot \left( L_\ell \left( \frac{\eta(1 - c)}{w_c(\eta)}, 0 \right) - H_\ell \left( \frac{\eta(1 - c)}{w_c(\eta)} \right) \right), \\ &\quad \text{by Lemma 9} \\ &\geq w_c(\eta) \cdot \alpha \left| \frac{\eta(1 - c)}{w_c(\eta)} - \frac{1}{2} \right|^r, \quad \text{by assumption} \\ &= w_c(\eta) \cdot \alpha \left| \frac{\eta - c}{2w_c(\eta)} \right|^r \\ &= \frac{\alpha}{2^r} \frac{|\eta - c|^r}{(w_c(\eta))^{r-1}} \\ &\geq \frac{\alpha}{2^r} |\eta - c|^r, \end{aligned}$$

where  $w_c(\eta)$  is as defined in Lemma 9 and the last inequality follows since  $w_c(\eta) = \eta(1 - c) + (1 - \eta)c \leq (1 - c) + c = 1$  and  $r - 1 \geq 0$ . This proves the claim in Eq. (3).

Next, we claim that for all  $\eta \in [0, 1]$  and  $f \in \bar{\mathbb{R}}$ ,

$$f(\eta - c) \leq 0 \implies L_\ell^{(c)}(\eta, 0) \leq L_\ell^{(c)}(\eta, f). \quad (4)$$

To see this, let  $\eta \in [0, 1]$ , and let  $f \in \bar{\mathbb{R}}$  be such that  $f(\eta - c) \leq 0$ . Let  $f^*$  denote any minimizer of  $L_\ell^{(c)}(\eta, f)$ . Since  $\ell$  is classification-calibrated at  $\frac{1}{2}$ , we have by Theorem 10 that  $\ell^{(c)}$  is classification-calibrated at  $c$ , and therefore  $f^*(\eta - c) > 0$ . Moreover, since  $\ell$  is convex in its second argument, we have that  $\ell^{(c)}$  is convex in its second argument, which in turn implies  $L_\ell^{(c)}$  is convex in its second argument. We consider the following three cases:

1.  $\eta > c$ : Then  $f \leq 0$  and  $f^* > 0$ . Therefore, by convexity of  $L_\ell^{(c)}$  in its second argument, we have

$$\begin{aligned} L_\ell^{(c)}(\eta, 0) &\leq \max\left(L_\ell^{(c)}(\eta, f), L_\ell^{(c)}(\eta, f^*)\right) \\ &= L_\ell^{(c)}(\eta, f). \end{aligned}$$

2.  $\eta < c$ : Then  $f \geq 0$  and  $f^* < 0$ . Again, by convexity of  $L_\ell^{(c)}$  in its second argument, we have

$$\begin{aligned} L_\ell^{(c)}(\eta, 0) &\leq \max\left(L_\ell^{(c)}(\eta, f), L_\ell^{(c)}(\eta, f^*)\right) \\ &= L_\ell^{(c)}(\eta, f). \end{aligned}$$

3.  $\eta = c$ : In this case,  $w_c(\eta) = 2c(1 - c)$ , and so

$$L_\ell^{(c)}(\eta, f) = 2c(1 - c) \cdot L_\ell\left(\frac{1}{2}, f\right),$$

which is minimized by  $f^* = 0$  (by the assumption that  $L_\ell(\frac{1}{2}, 0) = H_\ell(\frac{1}{2})$ ). This gives

$$L_\ell^{(c)}(\eta, 0) = L_\ell^{(c)}(\eta, f^*) \leq L_\ell^{(c)}(\eta, f).$$

This proves the claim in Eq. (4).

Putting everything together, we have for any  $f : \mathcal{X} \rightarrow \bar{\mathbb{R}}$  and  $h(x) = \text{sign}(f(x))$ :

$$\begin{aligned} \text{regret}_D^{0-1, (c)}[h] &\leq \mathbf{E}_x \left[ |\eta(x) - c| \cdot \mathbf{1}(f(x)(\eta(x) - c) \leq 0) \right], \\ &\quad \text{by Lemma 8 and definition of } h \\ &= \left( \left( \mathbf{E}_x \left[ |\eta(x) - c| \cdot \mathbf{1}(f(x)(\eta(x) - c) \leq 0) \right] \right)^r \right)^{1/r} \\ &\leq \left( \mathbf{E}_x \left[ |\eta(x) - c|^r \cdot \mathbf{1}(f(x)(\eta(x) - c) \leq 0) \right] \right)^{1/r}, \\ &\quad \text{by convexity of the function } g(z) = z^r \text{ (} r \geq 1 \text{)} \\ &\quad \text{and Jensen's inequality} \\ &\leq \frac{1}{\alpha^{1/r}} \left( \mathbf{E}_x \left[ \left( L_\ell^{(c)}(\eta(x), 0) - H_\ell^{(c)}(\eta(x)) \right) \right. \right. \\ &\quad \left. \left. \mathbf{1}(f(x)(\eta(x) - c) \leq 0) \right] \right)^{1/r}, \\ &\quad \text{by Eq. (3)} \\ &\leq \frac{1}{\alpha^{1/r}} \left( \mathbf{E}_x \left[ \left( L_\ell^{(c)}(\eta(x), f(x)) - H_\ell^{(c)}(\eta(x)) \right) \right] \right)^{1/r}, \\ &\quad \text{by Eq. (4)} \\ &= \frac{1}{\alpha^{1/r}} \left( \text{regret}_D^{\ell, (c)}[f] \right)^{1/r}. \end{aligned}$$

This proves the lemma.  $\square$

### Proof of Theorem 6

*Proof.* By Lemma 7, we have

$$\text{regret}_D^{0-1, (\hat{p}_S)}[h_S] \leq \frac{2}{\alpha^{1/r}} \left( \text{regret}_D^{\ell, (\hat{p}_S)}[f_S] \right)^{1/r}.$$

Thus, if  $K$  and  $\lambda_n$  can be chosen such that  $\text{regret}_D^{\ell, (\hat{p}_S)}[f_S] \xrightarrow{P} 0$ , then  $\text{regret}_D^{0-1, (\hat{p}_S)}[h_S] \xrightarrow{P} 0$ . The result then follows from Lemma 2.  $\square$

### Calculation of AM-Regret for Synthetic Data

Let  $D$  be a probability distribution on  $\mathbb{R}^d \times \{\pm 1\}$ , with  $\mathbf{P}(y = 1) = p$  for some  $p \in (0, 1)$ , and under which positive instances are drawn according to a multivariate Gaussian distribution  $\mathcal{N}(\mu, \Sigma)$  and negative instances are drawn according to  $\mathcal{N}(-\mu, \Sigma)$ , where  $\Sigma \in \mathbb{R}^{d \times d}$  is a symmetric positive definite matrix and  $\mu \in \mathbb{R}^d$ .

Then the AM measure of a classifier  $h : \mathbb{R}^d \rightarrow \{\pm 1\}$  w.r.t.  $D$  is given by

$$\text{AM}_D[h] = \frac{\text{TPR}_D[h] + \text{TNR}_D[h]}{2}.$$

For any *linear* classifier  $h(x) = \text{sign}(w^\top x + b)$ , where  $w \in \mathbb{R}^d$  and  $b \in \mathbb{R}$ , this can be written as

$$\begin{aligned} \text{AM}_D[h] &= \frac{1}{2} \left[ \int_{\{x | w^\top x > b\}} f_+(x) dx \right. \\ &\quad \left. + \int_{\{x | w^\top x \leq b\}} f_-(x) dx \right], \end{aligned}$$

where  $f_+$  is the pdf corresponding to the distribution  $\mathcal{N}(\mu, \Sigma)$  and  $f_-$  is the pdf corresponding to  $\mathcal{N}(-\mu, \Sigma)$ . This in turn can be converted to an expression involving one-dimensional integrations:

$$\text{AM}_D[h] = \frac{1}{2} \left[ \int_b^\infty g_+(z) dz + \int_{-\infty}^b g_-(z) dz \right],$$

where  $g_+$  is the pdf corresponding to the distribution  $\mathcal{N}(w^\top \mu, w^\top \Sigma w)$  and  $g_-$  is the pdf corresponding to  $\mathcal{N}(-w^\top \mu, w^\top \Sigma w)$ .

Moreover, for a distribution of the above form, it can be verified that the optimal classifier with respect to the AM measure,  $h_p^* : \mathbb{R}^d \rightarrow \{\pm 1\}$  given by  $h_p^*(x) = \text{sign}(\eta(x) - p)$  where  $\eta(x) = \mathbf{P}(y = 1 | x)$ , is a linear classifier. In particular, from standard results, we have

$$\eta(x) = \frac{p f_+(x)}{p f_+(x) + (1 - p) f_-(x)} = \frac{1}{1 + e^{-f(x)}},$$

where

$$f(x) = \ln \left( \frac{p f_+(x)}{(1 - p) f_-(x)} \right)$$

## Statistical Consistency of Class Imbalance Methods

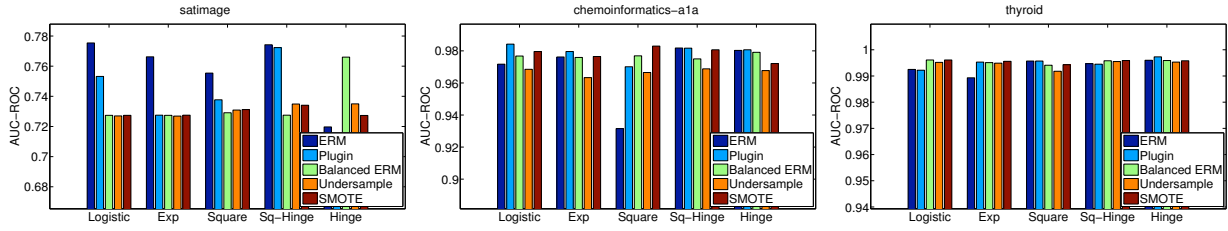

Figure 3. Results on the three data sets summarized in Table 3, using various algorithms in conjunction with different loss functions, in terms of AUC-ROC; higher values are better (see Section 6.2).

$$\begin{aligned}
 &= -\frac{1}{2}(x - \mu)^\top \Sigma^{-1}(x - \mu) \\
 &\quad + \frac{1}{2}(x + \mu)^\top \Sigma^{-1}(x + \mu) + \ln\left(\frac{p}{1-p}\right) \\
 &= 2\mu^\top \Sigma^{-1}x + \ln\left(\frac{p}{1-p}\right).
 \end{aligned}$$

This can be seen to yield

$$\begin{aligned}
 h_p^*(x) &= \text{sign}\left(\frac{1}{1 + e^{-f(x)}} - p\right) \\
 &= \text{sign}\left(f(x) - \ln\left(\frac{p}{1-p}\right)\right) \\
 &= \text{sign}(2\mu^\top \Sigma^{-1}x) \\
 &= \text{sign}(w^\top x), \quad \text{where } w = \Sigma^{-1}\mu.
 \end{aligned}$$

Thus the optimal AM value,  $\text{AM}_D^* = \text{AM}_D[h_p^*]$ , can be computed similarly as for any other linear classifier above, using  $w = \Sigma^{-1}\mu$  and  $b = 0$ . The AM-regret of any linear classifier  $h$  w.r.t.  $D$  can then be computed as

$$\text{regret}_D^{\text{AM}}[h] = \text{AM}_D[h_p^*] - \text{AM}_D[h].$$

### Additional Results on Real Data

Table 4 summarizes all 17 real data sets used in our experiments described in Section 6.2. Tables 5, 6, and 7 give results with all algorithms on all data sets, in terms of the AM, GM, and AUC-ROC performance measures, respectively. Tables 8, 9, and 10 give the average ranks of different algorithms (for each loss function) over the 17 data sets, based on mean AM, GM, and AUC-ROC performance, respectively. The AUC-ROC performance of all algorithms on the 3 data sets discussed in detail in Section 6.2 is also shown in the form of plots in Figure 3.

Table 4. Summary of 17 real data sets.

| Data set       | # examples | # features | $p = \mathbf{P}(y = 1)$ |
|----------------|------------|------------|-------------------------|
| abalone        | 4177       | 8          | 0.0077                  |
| car            | 1728       | 8          | 0.0376                  |
| chemo-a1a      | 2142       | 1021       | 0.0233                  |
| chemo-pde5     | 2142       | 1021       | 0.0233                  |
| covtype-binary | 38501      | 54         | 0.0713                  |
| german         | 1000       | 24         | 0.3000                  |
| kddcup08       | 102294     | 117        | 0.0061                  |
| kddcup98       | 191779     | 15         | 0.0507                  |
| letter         | 20000      | 16         | 0.0367                  |
| optdigits      | 5620       | 64         | 0.0986                  |
| pendigits      | 10992      | 16         | 0.0960                  |
| satimage       | 6435       | 36         | 0.0973                  |
| segment        | 2310       | 19         | 0.1429                  |
| shuttle        | 58000      | 9          | 0.0004                  |
| spambase       | 4601       | 57         | 0.3940                  |
| splice         | 3190       | 61         | 0.2404                  |
| thyroid        | 7200       | 21         | 0.0231                  |

Table 8. Average ranks for all algorithms (for each loss function) based on mean AM performance. Lower ranks are better.

| Algorithm    | Logistic    | Exp         | Square      | Sq-Hinge    | Hinge       |
|--------------|-------------|-------------|-------------|-------------|-------------|
| ERM          | 4.78        | 4.68        | 4.42        | 4.63        | 4.47        |
| Plugin       | 2.94        | <b>1.89</b> | 3.78        | 2.94        | 2.68        |
| Balanced ERM | <b>1.94</b> | 2.36        | 1.89        | <b>1.94</b> | <b>2.10</b> |
| Undersample  | 2.94        | 3.31        | 2.68        | 2.84        | 3.26        |
| SMOTE        | 2.21        | 2.52        | <b>1.84</b> | 2.36        | 2.42        |

Table 9. Average ranks for all algorithms (for each loss function) based on mean GM performance. Lower ranks are better.

| Algorithm    | Logistic    | Exp         | Square      | Sq-Hinge   | Hinge       |
|--------------|-------------|-------------|-------------|------------|-------------|
| ERM          | 4.78        | 4.68        | 4.47        | 4.68       | 4.52        |
| Plugin       | 3.0         | <b>1.89</b> | 3.73        | 3.0        | 2.63        |
| Balanced ERM | <b>1.89</b> | 2.42        | 1.89        | <b>2.0</b> | <b>2.31</b> |
| Undersample  | 2.94        | 3.21        | 2.68        | 2.89       | 3.10        |
| SMOTE        | 2.15        | 2.57        | <b>1.84</b> | 2.31       | 2.36        |

Table 10. Average ranks for all algorithms (for each loss function) based on mean AUC-ROC performance. Lower ranks are better.

| Algorithm    | Logistic    | Exp         | Square      | Sq-Hinge    | Hinge       |
|--------------|-------------|-------------|-------------|-------------|-------------|
| ERM          | 2.68        | 2.31        | 3.47        | 2.78        | 3.21        |
| Plugin       | 2.52        | <b>1.68</b> | 3.15        | 3.10        | 2.73        |
| Balanced ERM | <b>2.15</b> | 2.36        | <b>2.15</b> | <b>2.26</b> | <b>2.42</b> |
| Undersample  | 4.05        | 4.78        | 3.42        | 3.73        | 3.63        |
| SMOTE        | 2.42        | 2.63        | 2.36        | 2.42        | 2.68        |

Statistical Consistency of Class Imbalance Methods

Table 5. Results for all algorithms on all data sets, in terms of AM. For each loss function, the ranks of different algorithms are displayed in parentheses (i.e. ranks are column-relative within each data set block). Higher AM values are better; lower ranks are better.

| Dataset        | Algorithm    | Logistic                   | Exp                        | Square                     | Sq-Hinge                   | Hinge                      |
|----------------|--------------|----------------------------|----------------------------|----------------------------|----------------------------|----------------------------|
| abalone        | ERM          | 0.4999 ± 0.0003 (5)        | 0.4996 ± 0.0004 (5)        | 0.5000 ± 0.0000 (5)        | 0.5000 ± 0.0000 (5)        | 0.5000 ± 0.0000 (5)        |
|                | Plugin       | 0.6846 ± 0.0804 (4)        | <b>0.7363 ± 0.0872 (1)</b> | <b>0.7618 ± 0.0594 (1)</b> | 0.7052 ± 0.0689 (4)        | 0.5348 ± 0.0688 (4)        |
|                | Balanced ERM | <b>0.7570 ± 0.0701 (1)</b> | 0.7357 ± 0.0859 (2)        | 0.7295 ± 0.0851 (3)        | <b>0.7375 ± 0.0790 (1)</b> | <b>0.7694 ± 0.0618 (1)</b> |
|                | Undersample  | 0.7333 ± 0.0724 (2)        | 0.7117 ± 0.0856 (4)        | 0.7306 ± 0.0750 (2)        | 0.7284 ± 0.0821 (2)        | 0.7564 ± 0.0723 (2)        |
|                | SMOTE        | 0.7300 ± 0.0804 (3)        | 0.7185 ± 0.0704 (3)        | 0.7135 ± 0.0709 (4)        | 0.7140 ± 0.0904 (3)        | 0.7180 ± 0.0853 (3)        |
| car            | ERM          | 0.9285 ± 0.0496 (5)        | 0.9245 ± 0.0594 (5)        | 0.5000 ± 0.0000 (5)        | 0.9400 ± 0.0509 (5)        | 0.9481 ± 0.0641 (5)        |
|                | Plugin       | 0.9938 ± 0.0027 (3)        | <b>0.9947 ± 0.0028 (1)</b> | 0.7794 ± 0.0135 (4)        | 0.9929 ± 0.0044 (3)        | 0.9901 ± 0.0081 (3)        |
|                | Balanced ERM | <b>0.9944 ± 0.0027 (1)</b> | <b>0.9947 ± 0.0028 (1)</b> | 0.9318 ± 0.0064 (2)        | <b>0.9940 ± 0.0033 (1)</b> | 0.9911 ± 0.0036 (2)        |
|                | Undersample  | 0.9711 ± 0.0116 (4)        | 0.9710 ± 0.0119 (4)        | 0.9243 ± 0.0131 (3)        | 0.9752 ± 0.0109 (4)        | 0.9856 ± 0.0144 (4)        |
|                | SMOTE        | <b>0.9944 ± 0.0026 (1)</b> | 0.9941 ± 0.0032 (3)        | <b>0.9326 ± 0.0062 (1)</b> | 0.9936 ± 0.0037 (2)        | <b>0.9937 ± 0.0038 (1)</b> |
| chemo-a1a      | ERM          | 0.8274 ± 0.1060 (5)        | 0.8464 ± 0.0887 (5)        | 0.8140 ± 0.0771 (4)        | 0.8511 ± 0.0754 (5)        | 0.8986 ± 0.0575 (3)        |
|                | Plugin       | <b>0.9155 ± 0.0558 (1)</b> | <b>0.9085 ± 0.0578 (1)</b> | 0.8108 ± 0.0312 (5)        | <b>0.9223 ± 0.0572 (1)</b> | 0.9019 ± 0.0573 (2)        |
|                | Balanced ERM | 0.8987 ± 0.0651 (3)        | 0.9044 ± 0.0592 (2)        | 0.8937 ± 0.0607 (3)        | 0.8842 ± 0.0524 (4)        | <b>0.9416 ± 0.0314 (1)</b> |
|                | Undersample  | 0.9058 ± 0.0427 (2)        | 0.9008 ± 0.0475 (3)        | <b>0.9048 ± 0.0549 (1)</b> | 0.9096 ± 0.0388 (2)        | 0.8934 ± 0.0543 (4)        |
|                | SMOTE        | 0.8918 ± 0.0395 (4)        | 0.8765 ± 0.0425 (4)        | 0.9021 ± 0.0575 (2)        | 0.9089 ± 0.0526 (3)        | 0.8667 ± 0.0480 (5)        |
| chemo-pde5     | ERM          | 0.9164 ± 0.0689 (5)        | 0.9082 ± 0.0557 (5)        | 0.9064 ± 0.0775 (4)        | 0.9314 ± 0.0627 (4)        | 0.9348 ± 0.0621 (3)        |
|                | Plugin       | <b>0.9621 ± 0.0385 (1)</b> | <b>0.9351 ± 0.0609 (1)</b> | 0.8119 ± 0.0384 (5)        | <b>0.9633 ± 0.0334 (1)</b> | <b>0.9550 ± 0.0516 (1)</b> |
|                | Balanced ERM | 0.9441 ± 0.0540 (2)        | 0.9315 ± 0.0654 (2)        | 0.9497 ± 0.0422 (2)        | 0.9416 ± 0.0580 (2)        | 0.9404 ± 0.0452 (2)        |
|                | Undersample  | 0.9285 ± 0.0374 (4)        | 0.9241 ± 0.0353 (4)        | 0.9271 ± 0.0349 (3)        | 0.9275 ± 0.0358 (5)        | 0.9283 ± 0.0413 (5)        |
|                | SMOTE        | 0.9408 ± 0.0597 (3)        | 0.9278 ± 0.0743 (3)        | <b>0.9516 ± 0.0392 (1)</b> | 0.9380 ± 0.0592 (3)        | 0.9318 ± 0.0718 (4)        |
| covtype-binary | ERM          | 0.7157 ± 0.0113 (5)        | 0.7078 ± 0.0104 (5)        | 0.5882 ± 0.0058 (5)        | 0.7080 ± 0.0134 (5)        | 0.7232 ± 0.0104 (5)        |
|                | Plugin       | 0.8790 ± 0.0047 (4)        | 0.8840 ± 0.0048 (2)        | 0.8204 ± 0.0039 (4)        | 0.8752 ± 0.0054 (4)        | 0.8559 ± 0.0070 (4)        |
|                | Balanced ERM | 0.8846 ± 0.0042 (3)        | <b>0.8842 ± 0.0050 (1)</b> | 0.8801 ± 0.0046 (2)        | <b>0.8845 ± 0.0041 (1)</b> | 0.8842 ± 0.0042 (3)        |
|                | Undersample  | <b>0.8853 ± 0.0046 (1)</b> | 0.8828 ± 0.0049 (4)        | 0.8799 ± 0.0047 (3)        | <b>0.8845 ± 0.0046 (1)</b> | 0.8848 ± 0.0044 (2)        |
|                | SMOTE        | 0.8851 ± 0.0038 (2)        | 0.8835 ± 0.0049 (3)        | <b>0.8807 ± 0.0049 (1)</b> | 0.8843 ± 0.0035 (3)        | <b>0.8859 ± 0.0042 (1)</b> |
| german         | ERM          | 0.6832 ± 0.0283 (5)        | 0.6788 ± 0.0239 (5)        | 0.6776 ± 0.0215 (5)        | 0.6839 ± 0.0225 (5)        | 0.6796 ± 0.0277 (5)        |
|                | Plugin       | 0.7118 ± 0.0266 (2)        | 0.7030 ± 0.0335 (4)        | 0.7107 ± 0.0295 (2)        | 0.7139 ± 0.0332 (2)        | <b>0.7191 ± 0.0257 (1)</b> |
|                | Balanced ERM | 0.7079 ± 0.0337 (4)        | 0.7042 ± 0.0365 (3)        | 0.7058 ± 0.0347 (3)        | 0.7066 ± 0.0331 (4)        | 0.7059 ± 0.0370 (3)        |
|                | Undersample  | 0.7094 ± 0.0351 (3)        | <b>0.7151 ± 0.0290 (1)</b> | 0.7031 ± 0.0364 (4)        | 0.7070 ± 0.0362 (3)        | 0.7044 ± 0.0328 (4)        |
|                | SMOTE        | <b>0.7176 ± 0.0316 (1)</b> | 0.7080 ± 0.0313 (2)        | <b>0.7199 ± 0.0285 (1)</b> | <b>0.7193 ± 0.0287 (1)</b> | 0.7132 ± 0.0258 (2)        |
| kddcup08       | ERM          | 0.6326 ± 0.0162 (5)        | 0.6349 ± 0.0260 (5)        | 0.5004 ± 0.0012 (5)        | 0.5891 ± 0.0154 (5)        | 0.6224 ± 0.0150 (5)        |
|                | Plugin       | <b>0.8452 ± 0.0174 (1)</b> | 0.8294 ± 0.0226 (2)        | 0.7336 ± 0.0149 (4)        | <b>0.8396 ± 0.0182 (1)</b> | <b>0.8269 ± 0.0146 (1)</b> |
|                | Balanced ERM | 0.8255 ± 0.0171 (3)        | 0.8259 ± 0.0149 (3)        | 0.8244 ± 0.0120 (2)        | 0.8288 ± 0.0179 (3)        | 0.8266 ± 0.0151 (2)        |
|                | Undersample  | 0.8056 ± 0.0183 (4)        | 0.8025 ± 0.0168 (4)        | 0.8120 ± 0.0162 (3)        | 0.8080 ± 0.0199 (4)        | 0.8030 ± 0.0197 (4)        |
|                | SMOTE        | 0.8296 ± 0.0169 (2)        | <b>0.8311 ± 0.0214 (1)</b> | <b>0.8272 ± 0.0139 (1)</b> | 0.8289 ± 0.0189 (2)        | 0.8243 ± 0.0188 (3)        |
| kddcup98       | ERM          | 0.5000 ± 0.0000 (5)        | 0.5000 ± 0.0000 (5)        | 0.5000 ± 0.0000 (5)        | 0.5000 ± 0.0000 (5)        | 0.5000 ± 0.0000 (4)        |
|                | Plugin       | <b>0.5861 ± 0.0054 (1)</b> | <b>0.5855 ± 0.0068 (1)</b> | 0.5845 ± 0.0055 (3)        | 0.5849 ± 0.0055 (2)        | 0.4897 ± 0.0216 (5)        |
|                | Balanced ERM | 0.5853 ± 0.0060 (2)        | 0.5854 ± 0.0066 (2)        | <b>0.5853 ± 0.0063 (1)</b> | <b>0.5855 ± 0.0064 (1)</b> | <b>0.5816 ± 0.0063 (1)</b> |
|                | Undersample  | 0.5851 ± 0.0065 (3)        | 0.5848 ± 0.0062 (4)        | 0.5848 ± 0.0061 (2)        | 0.5848 ± 0.0061 (3)        | 0.5814 ± 0.0069 (2)        |
|                | SMOTE        | 0.5840 ± 0.0071 (4)        | 0.5849 ± 0.0065 (3)        | 0.5845 ± 0.0075 (3)        | 0.5839 ± 0.0071 (4)        | 0.5810 ± 0.0062 (3)        |
| letter         | ERM          | 0.8302 ± 0.0185 (5)        | 0.8196 ± 0.0192 (5)        | 0.5000 ± 0.0000 (5)        | 0.8281 ± 0.0162 (5)        | 0.8354 ± 0.0195 (5)        |
|                | Plugin       | 0.9386 ± 0.0149 (4)        | 0.9478 ± 0.0078 (3)        | 0.7590 ± 0.0048 (4)        | 0.9369 ± 0.0131 (4)        | 0.9229 ± 0.0174 (4)        |
|                | Balanced ERM | 0.9527 ± 0.0059 (2)        | 0.9475 ± 0.0093 (4)        | <b>0.9387 ± 0.0059 (1)</b> | 0.9526 ± 0.0056 (2)        | 0.9540 ± 0.0060 (3)        |
|                | Undersample  | 0.9519 ± 0.0052 (3)        | 0.9484 ± 0.0071 (2)        | 0.9371 ± 0.0070 (3)        | 0.9524 ± 0.0051 (3)        | 0.9541 ± 0.0058 (2)        |
|                | SMOTE        | <b>0.9547 ± 0.0056 (1)</b> | <b>0.9494 ± 0.0076 (1)</b> | 0.9378 ± 0.0071 (2)        | <b>0.9536 ± 0.0060 (1)</b> | <b>0.9559 ± 0.0061 (1)</b> |
| optdigits      | ERM          | 0.9877 ± 0.0084 (5)        | 0.9872 ± 0.0080 (5)        | 0.9863 ± 0.0093 (4)        | 0.9864 ± 0.0075 (5)        | 0.9886 ± 0.0063 (4)        |
|                | Plugin       | 0.9893 ± 0.0055 (3)        | <b>0.9896 ± 0.0066 (1)</b> | 0.8722 ± 0.0041 (5)        | 0.9873 ± 0.0052 (4)        | <b>0.9908 ± 0.0064 (1)</b> |
|                | Balanced ERM | <b>0.9900 ± 0.0066 (1)</b> | 0.9892 ± 0.0067 (2)        | <b>0.9925 ± 0.0035 (1)</b> | <b>0.9902 ± 0.0070 (1)</b> | 0.9895 ± 0.0073 (3)        |
|                | Undersample  | 0.9886 ± 0.0059 (4)        | 0.9880 ± 0.0077 (4)        | 0.9923 ± 0.0033 (3)        | 0.9888 ± 0.0065 (3)        | 0.9882 ± 0.0071 (5)        |
|                | SMOTE        | 0.9898 ± 0.0070 (2)        | 0.9884 ± 0.0071 (3)        | 0.9924 ± 0.0043 (2)        | 0.9899 ± 0.0065 (2)        | 0.9898 ± 0.0069 (2)        |
| pendigits      | ERM          | 0.9186 ± 0.0134 (5)        | 0.9047 ± 0.0152 (5)        | 0.6573 ± 0.0145 (5)        | 0.9160 ± 0.0152 (5)        | 0.9220 ± 0.0135 (5)        |
|                | Plugin       | 0.9556 ± 0.0075 (4)        | 0.9499 ± 0.0062 (3)        | 0.8032 ± 0.0072 (4)        | 0.9511 ± 0.0067 (4)        | 0.9508 ± 0.0095 (4)        |
|                | Balanced ERM | 0.9597 ± 0.0049 (2)        | 0.9495 ± 0.0059 (4)        | 0.9336 ± 0.0043 (2)        | <b>0.9596 ± 0.0054 (1)</b> | 0.9602 ± 0.0052 (2)        |
|                | Undersample  | 0.9574 ± 0.0056 (3)        | <b>0.9518 ± 0.0072 (1)</b> | 0.9327 ± 0.0054 (3)        | 0.9583 ± 0.0055 (3)        | 0.9589 ± 0.0061 (3)        |
|                | SMOTE        | <b>0.9598 ± 0.0061 (1)</b> | 0.9515 ± 0.0043 (2)        | <b>0.9345 ± 0.0047 (1)</b> | 0.9591 ± 0.0064 (2)        | <b>0.9615 ± 0.0057 (1)</b> |
| satimage       | ERM          | 0.5111 ± 0.0040 (5)        | 0.5075 ± 0.0051 (5)        | 0.5000 ± 0.0000 (5)        | 0.5041 ± 0.0036 (5)        | 0.5000 ± 0.0000 (5)        |
|                | Plugin       | 0.7133 ± 0.0127 (4)        | <b>0.7321 ± 0.0137 (1)</b> | 0.7156 ± 0.0079 (4)        | 0.7275 ± 0.0089 (2)        | 0.6460 ± 0.0337 (4)        |
|                | Balanced ERM | <b>0.7319 ± 0.0134 (1)</b> | 0.7320 ± 0.0136 (2)        | <b>0.7306 ± 0.0138 (1)</b> | <b>0.7312 ± 0.0140 (1)</b> | <b>0.7306 ± 0.0110 (1)</b> |
|                | Undersample  | 0.7288 ± 0.0188 (3)        | 0.7288 ± 0.0185 (4)        | 0.7272 ± 0.0172 (3)        | 0.7265 ± 0.0177 (3)        | 0.7223 ± 0.0128 (3)        |
|                | SMOTE        | 0.7312 ± 0.0135 (2)        | 0.7312 ± 0.0139 (3)        | 0.7281 ± 0.0132 (2)        | 0.7260 ± 0.0172 (4)        | 0.7261 ± 0.0126 (2)        |
| segment        | ERM          | 0.9962 ± 0.0049 (4)        | 0.9962 ± 0.0049 (2)        | <b>0.9970 ± 0.0039 (1)</b> | 0.9970 ± 0.0040 (2)        | <b>0.9984 ± 0.0030 (1)</b> |
|                | Plugin       | 0.9962 ± 0.0049 (4)        | 0.9961 ± 0.0048 (3)        | 0.9802 ± 0.0065 (5)        | <b>0.9975 ± 0.0032 (1)</b> | 0.9973 ± 0.0036 (3)        |
|                | Balanced ERM | <b>0.9978 ± 0.0035 (1)</b> | 0.9961 ± 0.0052 (3)        | <b>0.9970 ± 0.0039 (1)</b> | 0.9970 ± 0.0040 (2)        | 0.9978 ± 0.0036 (2)        |
|                | Undersample  | 0.9969 ± 0.0042 (2)        | 0.9961 ± 0.0046 (3)        | <b>0.9970 ± 0.0038 (1)</b> | 0.9970 ± 0.0046 (2)        | 0.9957 ± 0.0041 (5)        |
|                | SMOTE        | 0.9969 ± 0.0039 (2)        | <b>0.9963 ± 0.0043 (1)</b> | <b>0.9970 ± 0.0038 (1)</b> | 0.9968 ± 0.0038 (5)        | 0.9971 ± 0.0043 (4)        |
| shuttle        | ERM          | 0.5410 ± 0.0451 (5)        | 0.5000 ± 0.0000 (5)        | 0.5000 ± 0.0000 (5)        | 0.5000 ± 0.0000 (5)        | 0.5300 ± 0.0483 (5)        |
|                | Plugin       | 0.6241 ± 0.0638 (2)        | 0.6388 ± 0.0648 (3)        | 0.5901 ± 0.0695 (4)        | 0.6146 ± 0.0559 (4)        | 0.6163 ± 0.0880 (3)        |
|                | Balanced ERM | 0.6156 ± 0.0802 (3)        | 0.6389 ± 0.0649 (2)        | 0.6449 ± 0.0552 (2)        | 0.6379 ± 0.0650 (3)        | 0.6340 ± 0.0607 (2)        |
|                | Undersample  | <b>0.6548 ± 0.0825 (1)</b> | <b>0.6578 ± 0.0910 (1)</b> | <b>0.6474 ± 0.0939 (1)</b> | <b>0.6467 ± 0.0960 (1)</b> | <b>0.6602 ± 0.0913 (1)</b> |
|                | SMOTE        | 0.5954 ± 0.0694 (4)        | 0.6312 ± 0.0630 (4)        | 0.6384 ± 0.0539 (3)        | 0.6392 ± 0.0550 (2)        | 0.6156 ± 0.0998 (4)        |
| spambase       | ERM          | 0.9181 ± 0.0058 (5)        | 0.9081 ± 0.0094 (5)        | 0.8674 ± 0.0124 (5)        | 0.9171 ± 0.0069 (5)        | 0.9213 ± 0.0083 (5)        |
|                | Plugin       | 0.9247 ± 0.0066 (3)        | 0.9179 ± 0.0068 (2)        | <b>0.9034 ± 0.0086 (1)</b> | 0.9232 ± 0.0073 (3)        | <b>0.9269 ± 0.0082 (1)</b> |
|                | Balanced ERM | 0.9252 ± 0.0065 (2)        | <b>0.9180 ± 0.0067 (1)</b> | 0.9010 ± 0.0073 (3)        | 0.9244 ± 0.0063 (2)        | 0.9233 ± 0.0078 (4)        |
|                | Undersample  | 0.9227 ± 0.0074 (4)        | 0.9153 ± 0.0074 (4)        | 0.8996 ± 0.0076 (4)        | 0.9214 ± 0.0074 (4)        | 0.9246 ± 0.0074 (3)        |
|                | SMOTE        | <b>0.9256 ± 0.0068 (1)</b> | 0.9174 ± 0.0067 (3)        | 0.9028 ± 0.0063 (2)        | <b>0.9252 ± 0.0063 (1)</b> | 0.9253 ± 0.0068 (2)        |
| splice         | ERM          | 0.9681 ± 0.0080 (2)        | 0.9666 ± 0.0062 (2)        | <b>0.9671 ± 0.0073 (1)</b> | 0.9701 ± 0.0073 (2)        | 0.9664 ± 0.0096 (5)        |
|                | Plugin       | 0.9630 ± 0.0088 (4)        | 0.9659 ± 0.0071 (3)        | 0.8907 ± 0.0104 (5)        | 0.9586 ± 0.0081 (5)        | <b>0.9702 ± 0.0072 (1)</b> |
|                | Balanced ERM | 0.9664 ± 0.0076 (3)        | 0.9657 ± 0.0071 (4)        | 0.9600 ± 0.0070 (3)        | 0.9670 ± 0.0065 (3)        | 0.9686 ± 0.0078 (3)        |
|                | Undersample  | 0.9620 ± 0.0067 (5)        | 0.9612 ± 0.0067 (5)        | 0.9584 ± 0.0054 (4)        | 0.9640 ± 0.0057 (4)        | 0.9677 ± 0.0086 (4)        |
|                | SMOTE        | <b>0.9691 ± 0.0060 (1)</b> | <b>0.9674 ± 0.0069 (1)</b> | 0.9615 ± 0.0063 (2)        | <b>0.9706 ± 0.0064 (1)</b> | 0.9700 ± 0.0079 (2)        |
| thyroid        | ERM          | 0.8491 ± 0.0326 (5)        | 0.8497 ± 0.0323 (5)        | 0.6237 ± 0.0429 (5)        | 0.8515 ± 0.0300 (5)        | 0.8518 ± 0.0303 (5)        |
|                | Plugin       | 0.9669 ± 0.0144 (4)        | <b>0.9762 ± 0.0172 (1)</b> | 0.8302 ± 0.0062 (4)        | 0.9727 ± 0.0134 (4)        | <b>0.9838 ± 0.0045 (1)</b> |
|                | Balanced ERM | <b>0.9766 ± 0.0186 (1)</b> | 0.9746 ± 0.0183 (2)        | <b>0.9747 ± 0.0078 (1)</b> | 0.9741 ± 0.0144 (2)        | 0.9759 ± 0.0188 (2)        |
|                | Undersample  | 0.9721 ± 0.0138 (2)        | 0.9717 ± 0.0162 (3)        | 0.9598 ± 0.0143 (3)        | <b>0.9743 ± 0.0155 (1)</b> | 0.9725 ± 0.0122 (3)        |
|                | SMOTE        | 0.9681 ± 0.0214 (3)        | 0.9648 ± 0.0201 (4)        | 0.9729 ± 0.0110 (2)        | 0.9736 ± 0.0167 (3)        | 0.9608 ± 0.0232 (4)        |

## Statistical Consistency of Class Imbalance Methods

*Table 6.* Results for all algorithms on all data sets, in terms of GM. For each loss function, the ranks of different algorithms are displayed in parentheses (i.e. ranks are column-relative within each data set block). Higher GM values are better; lower ranks are better.

| Dataset        | Algorithm    | Logistic                   | Exp                        | Square                     | Sq-Hinge                   | Hinge                      |
|----------------|--------------|----------------------------|----------------------------|----------------------------|----------------------------|----------------------------|
| abalone        | ERM          | 0.0000 ± 0.0000 (5)        | 0.0000 ± 0.0000 (5)        | 0.0000 ± 0.0000 (5)        | 0.0000 ± 0.0000 (5)        | 0.0000 ± 0.0000 (5)        |
|                | Plugin       | 0.6761 ± 0.0787 (4)        | <b>0.7286 ± 0.0926 (1)</b> | <b>0.7405 ± 0.0501 (1)</b> | 0.6972 ± 0.0598 (4)        | 0.4238 ± 0.2115 (4)        |
|                | Balanced ERM | <b>0.7528 ± 0.0707 (1)</b> | 0.7281 ± 0.0913 (2)        | 0.7216 ± 0.0906 (3)        | <b>0.7307 ± 0.0831 (1)</b> | <b>0.7661 ± 0.0604 (1)</b> |
|                | Undersample  | 0.7268 ± 0.0739 (2)        | 0.7039 ± 0.0893 (4)        | 0.7236 ± 0.0772 (2)        | 0.7216 ± 0.0843 (2)        | 0.7502 ± 0.0731 (2)        |
|                | SMOTE        | 0.7207 ± 0.0886 (3)        | 0.7115 ± 0.0757 (3)        | 0.7045 ± 0.0777 (4)        | 0.7015 ± 0.1017 (3)        | 0.7053 ± 0.0982 (3)        |
| car            | ERM          | 0.9247 ± 0.0542 (5)        | 0.9196 ± 0.0671 (5)        | 0.0000 ± 0.0000 (5)        | 0.9369 ± 0.0555 (5)        | 0.9444 ± 0.0723 (5)        |
|                | Plugin       | 0.9938 ± 0.0027 (3)        | <b>0.9947 ± 0.0028 (1)</b> | 0.7474 ± 0.0179 (4)        | 0.9929 ± 0.0044 (3)        | 0.9900 ± 0.0082 (3)        |
|                | Balanced ERM | <b>0.9944 ± 0.0027 (1)</b> | <b>0.9947 ± 0.0028 (1)</b> | 0.9292 ± 0.0068 (2)        | <b>0.9939 ± 0.0033 (1)</b> | 0.9911 ± 0.0036 (2)        |
|                | Undersample  | 0.9706 ± 0.0119 (4)        | 0.9704 ± 0.0123 (4)        | 0.9211 ± 0.0142 (3)        | 0.9749 ± 0.0112 (4)        | 0.9855 ± 0.0147 (4)        |
|                | SMOTE        | <b>0.9944 ± 0.0027 (1)</b> | 0.9941 ± 0.0032 (3)        | <b>0.9301 ± 0.0066 (1)</b> | 0.9936 ± 0.0037 (2)        | <b>0.9937 ± 0.0039 (1)</b> |
| chemo-a1a      | ERM          | 0.7998 ± 0.1326 (5)        | 0.8263 ± 0.1076 (5)        | 0.7882 ± 0.1002 (5)        | 0.8337 ± 0.0915 (5)        | 0.8929 ± 0.0628 (3)        |
|                | Plugin       | <b>0.9121 ± 0.0597 (1)</b> | <b>0.9051 ± 0.0618 (1)</b> | 0.7927 ± 0.0308 (4)        | <b>0.9195 ± 0.0609 (1)</b> | 0.8973 ± 0.0618 (2)        |
|                | Balanced ERM | 0.8952 ± 0.0687 (3)        | 0.9014 ± 0.0617 (2)        | 0.8888 ± 0.0671 (3)        | 0.8803 ± 0.0557 (4)        | <b>0.9409 ± 0.0316 (1)</b> |
|                | Undersample  | 0.9038 ± 0.0440 (2)        | 0.8989 ± 0.0486 (3)        | <b>0.9028 ± 0.0562 (1)</b> | 0.9083 ± 0.0391 (2)        | 0.8893 ± 0.0620 (4)        |
|                | SMOTE        | 0.8882 ± 0.0427 (4)        | 0.8703 ± 0.0492 (4)        | 0.8970 ± 0.0640 (2)        | 0.9060 ± 0.0558 (3)        | 0.8604 ± 0.0530 (5)        |
| chemo-pde5     | ERM          | 0.9097 ± 0.0773 (5)        | 0.9018 ± 0.0622 (5)        | 0.8980 ± 0.0867 (4)        | 0.9267 ± 0.0687 (4)        | 0.9305 ± 0.0681 (3)        |
|                | Plugin       | <b>0.9610 ± 0.0403 (1)</b> | <b>0.9321 ± 0.0650 (1)</b> | 0.7953 ± 0.0371 (5)        | <b>0.9625 ± 0.0351 (1)</b> | <b>0.9533 ± 0.0559 (1)</b> |
|                | Balanced ERM | 0.9418 ± 0.0581 (2)        | 0.9278 ± 0.0705 (2)        | 0.9484 ± 0.0438 (2)        | 0.9390 ± 0.0623 (2)        | 0.9388 ± 0.0470 (2)        |
|                | Undersample  | 0.9270 ± 0.0381 (4)        | 0.9226 ± 0.0359 (3)        | 0.9260 ± 0.0356 (3)        | 0.9264 ± 0.0366 (5)        | 0.9266 ± 0.0425 (4)        |
|                | SMOTE        | 0.9379 ± 0.0638 (3)        | 0.9222 ± 0.0826 (4)        | <b>0.9501 ± 0.0410 (1)</b> | 0.9352 ± 0.0632 (3)        | 0.9264 ± 0.0810 (5)        |
| covtype-binary | ERM          | 0.6629 ± 0.0168 (5)        | 0.6524 ± 0.0160 (5)        | 0.4229 ± 0.0137 (5)        | 0.6509 ± 0.0205 (5)        | 0.6733 ± 0.0154 (5)        |
|                | Plugin       | 0.8781 ± 0.0045 (4)        | 0.8836 ± 0.0047 (2)        | 0.8065 ± 0.0041 (4)        | 0.8737 ± 0.0051 (4)        | 0.8547 ± 0.0067 (4)        |
|                | Balanced ERM | 0.8841 ± 0.0041 (3)        | <b>0.8839 ± 0.0049 (1)</b> | 0.8791 ± 0.0045 (2)        | <b>0.8839 ± 0.0040 (1)</b> | 0.8834 ± 0.0040 (3)        |
|                | Undersample  | <b>0.8848 ± 0.0045 (1)</b> | 0.8824 ± 0.0047 (4)        | 0.8789 ± 0.0046 (3)        | <b>0.8839 ± 0.0044 (1)</b> | 0.8843 ± 0.0043 (2)        |
|                | SMOTE        | 0.8846 ± 0.0037 (2)        | 0.8832 ± 0.0048 (3)        | <b>0.8798 ± 0.0048 (1)</b> | 0.8838 ± 0.0034 (3)        | <b>0.8855 ± 0.0041 (1)</b> |
| german         | ERM          | 0.6505 ± 0.0360 (5)        | 0.6442 ± 0.0322 (5)        | 0.6402 ± 0.0278 (5)        | 0.6502 ± 0.0301 (5)        | 0.6449 ± 0.0365 (5)        |
|                | Plugin       | 0.7109 ± 0.0267 (2)        | 0.7017 ± 0.0333 (4)        | 0.7074 ± 0.0275 (2)        | 0.7114 ± 0.0316 (2)        | <b>0.7178 ± 0.0258 (1)</b> |
|                | Balanced ERM | 0.7071 ± 0.0337 (4)        | 0.7029 ± 0.0364 (3)        | 0.7047 ± 0.0342 (3)        | 0.7056 ± 0.0328 (4)        | 0.7047 ± 0.0372 (3)        |
|                | Undersample  | 0.7082 ± 0.0348 (3)        | <b>0.7140 ± 0.0291 (1)</b> | 0.7020 ± 0.0360 (4)        | 0.7059 ± 0.0359 (3)        | 0.7032 ± 0.0329 (4)        |
|                | SMOTE        | <b>0.7163 ± 0.0322 (1)</b> | 0.7063 ± 0.0321 (2)        | <b>0.7192 ± 0.0282 (1)</b> | <b>0.7185 ± 0.0288 (1)</b> | 0.7120 ± 0.0264 (2)        |
| kddcup08       | ERM          | 0.5147 ± 0.0312 (5)        | 0.5182 ± 0.0528 (5)        | 0.0087 ± 0.0276 (5)        | 0.4209 ± 0.0372 (5)        | 0.4945 ± 0.0299 (5)        |
|                | Plugin       | <b>0.8434 ± 0.0185 (1)</b> | 0.8261 ± 0.0245 (2)        | 0.7149 ± 0.0158 (4)        | <b>0.8349 ± 0.0197 (1)</b> | <b>0.8253 ± 0.0153 (1)</b> |
|                | Balanced ERM | 0.8239 ± 0.0181 (3)        | 0.8232 ± 0.0160 (3)        | 0.8229 ± 0.0129 (2)        | 0.8268 ± 0.0191 (2)        | 0.8248 ± 0.0163 (2)        |
|                | Undersample  | 0.8052 ± 0.0187 (4)        | 0.8022 ± 0.0171 (4)        | 0.8114 ± 0.0164 (3)        | 0.8076 ± 0.0202 (4)        | 0.8026 ± 0.0199 (4)        |
|                | SMOTE        | 0.8261 ± 0.0184 (2)        | <b>0.8272 ± 0.0231 (1)</b> | <b>0.8257 ± 0.0147 (1)</b> | 0.8257 ± 0.0202 (3)        | 0.8208 ± 0.0204 (3)        |
| kddcup98       | ERM          | 0.0000 ± 0.0000 (5)        | 0.0000 ± 0.0000 (5)        | 0.0000 ± 0.0000 (5)        | 0.0000 ± 0.0000 (5)        | 0.0000 ± 0.0000 (5)        |
|                | Plugin       | <b>0.5856 ± 0.0059 (1)</b> | <b>0.5850 ± 0.0072 (1)</b> | 0.5838 ± 0.0052 (3)        | 0.5842 ± 0.0052 (2)        | 0.4174 ± 0.0722 (4)        |
|                | Balanced ERM | 0.5846 ± 0.0065 (2)        | 0.5848 ± 0.0071 (2)        | <b>0.5846 ± 0.0068 (1)</b> | <b>0.5848 ± 0.0070 (1)</b> | 0.5798 ± 0.0070 (3)        |
|                | Undersample  | 0.5844 ± 0.0070 (3)        | 0.5840 ± 0.0067 (3)        | 0.5840 ± 0.0066 (2)        | 0.5841 ± 0.0066 (3)        | <b>0.5808 ± 0.0069 (1)</b> |
|                | SMOTE        | 0.5833 ± 0.0076 (4)        | 0.5840 ± 0.0073 (3)        | 0.5838 ± 0.0080 (3)        | 0.5832 ± 0.0076 (4)        | 0.5805 ± 0.0061 (2)        |
| letter         | ERM          | 0.8134 ± 0.0228 (5)        | 0.8004 ± 0.0241 (5)        | 0.0000 ± 0.0000 (5)        | 0.8107 ± 0.0199 (5)        | 0.8194 ± 0.0238 (5)        |
|                | Plugin       | 0.9383 ± 0.0148 (4)        | 0.9477 ± 0.0078 (3)        | 0.7197 ± 0.0067 (4)        | 0.9368 ± 0.0130 (4)        | 0.9227 ± 0.0174 (4)        |
|                | Balanced ERM | 0.9526 ± 0.0058 (2)        | 0.9473 ± 0.0092 (4)        | <b>0.9376 ± 0.0058 (1)</b> | 0.9525 ± 0.0055 (2)        | 0.9539 ± 0.0059 (3)        |
|                | Undersample  | 0.9517 ± 0.0051 (3)        | 0.9482 ± 0.0070 (2)        | 0.9359 ± 0.0069 (3)        | 0.9522 ± 0.0050 (3)        | 0.9540 ± 0.0057 (2)        |
|                | SMOTE        | <b>0.9546 ± 0.0056 (1)</b> | <b>0.9493 ± 0.0075 (1)</b> | 0.9368 ± 0.0070 (2)        | <b>0.9535 ± 0.0060 (1)</b> | <b>0.9558 ± 0.0060 (1)</b> |
| optdigits      | ERM          | 0.9876 ± 0.0085 (5)        | 0.9871 ± 0.0081 (5)        | 0.9862 ± 0.0094 (4)        | 0.9863 ± 0.0076 (5)        | 0.9885 ± 0.0064 (4)        |
|                | Plugin       | 0.9893 ± 0.0056 (3)        | <b>0.9895 ± 0.0067 (1)</b> | 0.8628 ± 0.0048 (5)        | 0.9873 ± 0.0053 (4)        | <b>0.9908 ± 0.0065 (1)</b> |
|                | Balanced ERM | <b>0.9899 ± 0.0067 (1)</b> | 0.9892 ± 0.0067 (2)        | <b>0.9925 ± 0.0035 (1)</b> | <b>0.9902 ± 0.0071 (1)</b> | 0.9895 ± 0.0073 (3)        |
|                | Undersample  | 0.9885 ± 0.0059 (4)        | 0.9880 ± 0.0078 (4)        | 0.9923 ± 0.0033 (3)        | 0.9887 ± 0.0065 (3)        | 0.9881 ± 0.0071 (5)        |
|                | SMOTE        | 0.9898 ± 0.0070 (2)        | 0.9883 ± 0.0072 (3)        | 0.9924 ± 0.0043 (2)        | 0.9899 ± 0.0065 (2)        | 0.9898 ± 0.0070 (2)        |
| pendigits      | ERM          | 0.9158 ± 0.0145 (5)        | 0.9008 ± 0.0166 (5)        | 0.5619 ± 0.0259 (5)        | 0.9129 ± 0.0165 (5)        | 0.9193 ± 0.0146 (5)        |
|                | Plugin       | 0.9555 ± 0.0075 (4)        | 0.9498 ± 0.0061 (3)        | 0.7790 ± 0.0090 (4)        | 0.9509 ± 0.0066 (4)        | 0.9507 ± 0.0095 (4)        |
|                | Balanced ERM | 0.9596 ± 0.0049 (2)        | 0.9495 ± 0.0059 (4)        | 0.9316 ± 0.0044 (2)        | <b>0.9595 ± 0.0053 (1)</b> | 0.9601 ± 0.0052 (2)        |
|                | Undersample  | 0.9573 ± 0.0056 (3)        | <b>0.9517 ± 0.0072 (1)</b> | 0.9306 ± 0.0056 (3)        | 0.9582 ± 0.0055 (3)        | 0.9589 ± 0.0061 (3)        |
|                | SMOTE        | <b>0.9597 ± 0.0061 (1)</b> | 0.9514 ± 0.0043 (2)        | <b>0.9326 ± 0.0048 (1)</b> | 0.9590 ± 0.0064 (2)        | <b>0.9615 ± 0.0057 (1)</b> |
| satimage       | ERM          | 0.1520 ± 0.0311 (5)        | 0.1252 ± 0.0536 (5)        | 0.0000 ± 0.0000 (5)        | 0.0792 ± 0.0476 (5)        | 0.0000 ± 0.0000 (5)        |
|                | Plugin       | 0.6868 ± 0.0128 (4)        | <b>0.7180 ± 0.0132 (1)</b> | 0.6683 ± 0.0087 (4)        | 0.6923 ± 0.0060 (4)        | 0.5893 ± 0.0895 (4)        |
|                | Balanced ERM | <b>0.7178 ± 0.0129 (1)</b> | 0.7179 ± 0.0131 (2)        | <b>0.7149 ± 0.0138 (1)</b> | <b>0.7167 ± 0.0135 (1)</b> | 0.6981 ± 0.0078 (3)        |
|                | Undersample  | 0.7131 ± 0.0213 (3)        | 0.7133 ± 0.0211 (4)        | 0.7086 ± 0.0190 (3)        | 0.7084 ± 0.0192 (3)        | 0.7158 ± 0.0124 (2)        |
|                | SMOTE        | 0.7168 ± 0.0134 (2)        | 0.7167 ± 0.0138 (3)        | 0.7100 ± 0.0138 (2)        | 0.7105 ± 0.0162 (2)        | <b>0.7230 ± 0.0117 (1)</b> |
| segment        | ERM          | 0.9962 ± 0.0049 (4)        | 0.9962 ± 0.0049 (2)        | <b>0.9970 ± 0.0039 (1)</b> | 0.9969 ± 0.0040 (3)        | <b>0.9984 ± 0.0031 (1)</b> |
|                | Plugin       | 0.9962 ± 0.0049 (4)        | 0.9960 ± 0.0048 (4)        | 0.9800 ± 0.0065 (5)        | <b>0.9975 ± 0.0032 (1)</b> | 0.9973 ± 0.0036 (3)        |
|                | Balanced ERM | <b>0.9978 ± 0.0035 (1)</b> | 0.9960 ± 0.0052 (4)        | <b>0.9970 ± 0.0039 (1)</b> | 0.9969 ± 0.0040 (3)        | 0.9978 ± 0.0037 (2)        |
|                | Undersample  | 0.9969 ± 0.0043 (2)        | 0.9961 ± 0.0046 (3)        | <b>0.9970 ± 0.0038 (1)</b> | 0.9970 ± 0.0046 (2)        | 0.9957 ± 0.0041 (5)        |
|                | SMOTE        | 0.9969 ± 0.0039 (2)        | <b>0.9963 ± 0.0043 (1)</b> | <b>0.9970 ± 0.0038 (1)</b> | 0.9968 ± 0.0038 (5)        | 0.9971 ± 0.0043 (4)        |
| shuttle        | ERM          | 0.2014 ± 0.2147 (5)        | 0.0000 ± 0.0000 (5)        | 0.0000 ± 0.0000 (5)        | 0.0000 ± 0.0000 (5)        | 0.1342 ± 0.2160 (5)        |
|                | Plugin       | 0.5653 ± 0.2060 (3)        | 0.6163 ± 0.0787 (2)        | 0.5846 ± 0.0719 (4)        | 0.6052 ± 0.0613 (3)        | 0.5934 ± 0.0839 (3)        |
|                | Balanced ERM | 0.5838 ± 0.1125 (2)        | 0.6163 ± 0.0788 (2)        | 0.6199 ± 0.0705 (2)        | 0.6046 ± 0.0953 (4)        | 0.5954 ± 0.0914 (2)        |
|                | Undersample  | <b>0.6407 ± 0.0931 (1)</b> | <b>0.6443 ± 0.0979 (1)</b> | <b>0.6353 ± 0.1075 (1)</b> | <b>0.6334 ± 0.1089 (1)</b> | <b>0.6470 ± 0.0999 (1)</b> |
|                | SMOTE        | 0.5594 ± 0.0970 (4)        | 0.6027 ± 0.0815 (4)        | 0.6146 ± 0.0673 (3)        | 0.6154 ± 0.0686 (2)        | 0.5646 ± 0.1839 (4)        |
| spambase       | ERM          | 0.9175 ± 0.0060 (5)        | 0.9073 ± 0.0097 (5)        | 0.8630 ± 0.0132 (5)        | 0.9164 ± 0.0071 (5)        | 0.9206 ± 0.0085 (5)        |
|                | Plugin       | 0.9247 ± 0.0066 (3)        | 0.9178 ± 0.0069 (2)        | <b>0.9033 ± 0.0086 (1)</b> | 0.9231 ± 0.0073 (3)        | <b>0.9268 ± 0.0082 (1)</b> |
|                | Balanced ERM | 0.9251 ± 0.0065 (2)        | <b>0.9179 ± 0.0067 (1)</b> | 0.9005 ± 0.0073 (3)        | 0.9243 ± 0.0063 (2)        | 0.9231 ± 0.0080 (4)        |
|                | Undersample  | 0.9227 ± 0.0074 (4)        | 0.9152 ± 0.0074 (4)        | 0.8991 ± 0.0077 (4)        | 0.9213 ± 0.0074 (4)        | 0.9245 ± 0.0074 (3)        |
|                | SMOTE        | <b>0.9256 ± 0.0069 (1)</b> | 0.9174 ± 0.0068 (3)        | 0.9024 ± 0.0063 (2)        | <b>0.9252 ± 0.0063 (1)</b> | 0.9251 ± 0.0069 (2)        |
| splice         | ERM          | 0.9680 ± 0.0081 (2)        | 0.9665 ± 0.0063 (2)        | <b>0.9670 ± 0.0073 (1)</b> | 0.9700 ± 0.0074 (2)        | 0.9662 ± 0.0096 (5)        |
|                | Plugin       | 0.9629 ± 0.0088 (4)        | 0.9658 ± 0.0071 (3)        | 0.8847 ± 0.0112 (5)        | 0.9585 ± 0.0082 (5)        | <b>0.9702 ± 0.0072 (1)</b> |
|                | Balanced ERM | 0.9664 ± 0.0077 (3)        | 0.9657 ± 0.0070 (4)        | 0.9597 ± 0.0070 (3)        | 0.9670 ± 0.0065 (3)        | 0.9685 ± 0.0078 (3)        |
|                | Undersample  | 0.9618 ± 0.0066 (5)        | 0.9610 ± 0.0067 (5)        | 0.9580 ± 0.0055 (4)        | 0.9638 ± 0.0057 (4)        | 0.9677 ± 0.0086 (4)        |
|                | SMOTE        | <b>0.9691 ± 0.0060 (1)</b> | <b>0.9674 ± 0.0069 (1)</b> | 0.9613 ± 0.0063 (2)        | <b>0.9706 ± 0.0064 (1)</b> | 0.9699 ± 0.0080 (2)        |
| thyroid        | ERM          | 0.8352 ± 0.0390 (5)        | 0.8360 ± 0.0383 (5)        | 0.4906 ± 0.0883 (5)        | 0.8382 ± 0.0358 (5)        | 0.8385 ± 0.0361 (5)        |
|                | Plugin       | 0.9667 ± 0.0144 (4)        | <b>0.9761 ± 0.0175 (1)</b> | 0.8127 ± 0.0076 (4)        | 0.9726 ± 0.0134 (4)        | <b>0.9837 ± 0.0045 (1)</b> |
|                | Balanced ERM | <b>0.9765 ± 0.0190 (1)</b> | 0.9745 ± 0.0185 (2)        | <b>0.9746 ± 0.0078 (1)</b> | 0.9740 ± 0.0146 (2)        | 0.9757 ± 0.0190 (2)        |
|                | Undersample  | 0.9720 ± 0.0139 (2)        | 0.9716 ± 0.0164 (3)        | 0.9597 ± 0.0144 (3)        | <b>0.9742 ± 0.0157 (1)</b> | 0.9724 ± 0.0123 (3)        |
|                | SMOTE        | 0.9678 ± 0.0220 (3)        | 0.9644 ± 0.0208 (4)        | 0.9728 ± 0.0109 (2)        | 0.9734 ± 0.0169 (3)        | 0.9601 ± 0.0240 (4)        |

### Statistical Consistency of Class Imbalance Methods

Table 7. Results for all algorithms on all data sets, in terms of AUC-ROC. For each loss function, the ranks of different algorithms are displayed in parentheses (i.e. ranks are column-relative within each data set block). Higher AUC values are better; lower ranks are better.

| Dataset        | Algorithm    | Logistic                   | Exp                        | Square                     | Sq-Hinge                   | Hinge                      |
|----------------|--------------|----------------------------|----------------------------|----------------------------|----------------------------|----------------------------|
| abalone        | ERM          | 0.7860 ± 0.0794 (4)        | 0.7943 ± 0.0712 (3)        | <b>0.8519 ± 0.0583 (1)</b> | 0.7839 ± 0.0912 (5)        | 0.6121 ± 0.0873 (4)        |
|                | Plugin       | 0.7696 ± 0.0640 (5)        | <b>0.7980 ± 0.0661 (1)</b> | 0.8498 ± 0.0560 (2)        | 0.7921 ± 0.0857 (4)        | 0.6075 ± 0.1185 (5)        |
|                | Balanced ERM | <b>0.8082 ± 0.0654 (1)</b> | 0.7963 ± 0.0619 (2)        | 0.8228 ± 0.0570 (3)        | 0.8086 ± 0.0607 (2)        | <b>0.8217 ± 0.0628 (1)</b> |
|                | Undersample  | 0.7942 ± 0.0717 (3)        | 0.7806 ± 0.0789 (5)        | 0.8130 ± 0.0614 (5)        | <b>0.8117 ± 0.0695 (1)</b> | 0.8184 ± 0.0666 (2)        |
|                | SMOTE        | 0.8018 ± 0.0612 (2)        | 0.7826 ± 0.0638 (4)        | 0.8169 ± 0.0536 (4)        | 0.8033 ± 0.0608 (3)        | 0.8104 ± 0.0648 (3)        |
| car            | ERM          | <b>0.9985 ± 0.0011 (1)</b> | <b>0.9985 ± 0.0012 (1)</b> | 0.9961 ± 0.0020 (4)        | 0.9984 ± 0.0013 (3)        | 0.9979 ± 0.0009 (3)        |
|                | Plugin       | 0.9984 ± 0.0011 (4)        | <b>0.9985 ± 0.0012 (1)</b> | 0.9964 ± 0.0022 (3)        | 0.9984 ± 0.0011 (3)        | 0.9980 ± 0.0011 (2)        |
|                | Balanced ERM | <b>0.9985 ± 0.0010 (1)</b> | <b>0.9985 ± 0.0012 (1)</b> | <b>0.9980 ± 0.0015 (1)</b> | <b>0.9985 ± 0.0011 (1)</b> | <b>0.9981 ± 0.0019 (1)</b> |
|                | Undersample  | 0.9936 ± 0.0051 (5)        | 0.9933 ± 0.0051 (5)        | 0.9937 ± 0.0051 (5)        | 0.9935 ± 0.0061 (5)        | 0.9957 ± 0.0038 (5)        |
|                | SMOTE        | <b>0.9985 ± 0.0010 (1)</b> | 0.9984 ± 0.0012 (4)        | 0.9965 ± 0.0026 (2)        | <b>0.9985 ± 0.0010 (1)</b> | 0.9979 ± 0.0016 (3)        |
| chemo-a1a      | ERM          | 0.9717 ± 0.0324 (4)        | 0.9762 ± 0.0272 (3)        | 0.9315 ± 0.0604 (5)        | <b>0.9818 ± 0.0213 (1)</b> | 0.9803 ± 0.0213 (2)        |
|                | Plugin       | <b>0.9842 ± 0.0175 (1)</b> | <b>0.9796 ± 0.0123 (1)</b> | 0.9701 ± 0.0288 (3)        | 0.9817 ± 0.0206 (2)        | <b>0.9807 ± 0.0174 (1)</b> |
|                | Balanced ERM | 0.9768 ± 0.0132 (3)        | 0.9759 ± 0.0130 (4)        | 0.9769 ± 0.0120 (2)        | 0.9750 ± 0.0116 (4)        | 0.9791 ± 0.0112 (3)        |
|                | Undersample  | 0.9685 ± 0.0144 (5)        | 0.9633 ± 0.0265 (5)        | 0.9665 ± 0.0293 (4)        | 0.9688 ± 0.0189 (5)        | 0.9677 ± 0.0147 (5)        |
|                | SMOTE        | 0.9796 ± 0.0104 (2)        | 0.9765 ± 0.0069 (2)        | <b>0.9830 ± 0.0116 (1)</b> | 0.9807 ± 0.0120 (3)        | 0.9721 ± 0.0098 (4)        |
| chemo-pde5     | ERM          | 0.9845 ± 0.0267 (2)        | <b>0.9876 ± 0.0247 (1)</b> | 0.9615 ± 0.0486 (5)        | <b>0.9880 ± 0.0239 (1)</b> | <b>0.9852 ± 0.0233 (1)</b> |
|                | Plugin       | <b>0.9868 ± 0.0260 (1)</b> | 0.9801 ± 0.0321 (3)        | 0.9784 ± 0.0366 (4)        | 0.9817 ± 0.0438 (3)        | 0.9829 ± 0.0303 (2)        |
|                | Balanced ERM | 0.9802 ± 0.0321 (3)        | 0.9796 ± 0.0326 (4)        | <b>0.9828 ± 0.0284 (1)</b> | 0.9821 ± 0.0315 (2)        | 0.9803 ± 0.0315 (4)        |
|                | Undersample  | 0.9785 ± 0.0253 (5)        | 0.9778 ± 0.0252 (5)        | 0.9797 ± 0.0248 (3)        | 0.9797 ± 0.0249 (5)        | 0.9793 ± 0.0248 (5)        |
|                | SMOTE        | 0.9798 ± 0.0316 (4)        | 0.9828 ± 0.0293 (2)        | 0.9818 ± 0.0286 (2)        | 0.9812 ± 0.0307 (4)        | 0.9815 ± 0.0253 (3)        |
| covtype-binary | ERM          | 0.9472 ± 0.0031 (5)        | <b>0.9483 ± 0.0031 (1)</b> | 0.9298 ± 0.0037 (5)        | 0.9475 ± 0.0033 (4)        | 0.9396 ± 0.0038 (4)        |
|                | Plugin       | 0.9482 ± 0.0032 (4)        | <b>0.9483 ± 0.0029 (1)</b> | 0.9299 ± 0.0038 (4)        | 0.9475 ± 0.0033 (4)        | 0.9386 ± 0.0040 (5)        |
|                | Balanced ERM | <b>0.9489 ± 0.0027 (1)</b> | <b>0.9483 ± 0.0029 (1)</b> | 0.9451 ± 0.0027 (2)        | <b>0.9486 ± 0.0026 (1)</b> | <b>0.9475 ± 0.0027 (1)</b> |
|                | Undersample  | 0.9485 ± 0.0027 (3)        | 0.9477 ± 0.0030 (5)        | 0.9449 ± 0.0026 (3)        | 0.9481 ± 0.0027 (3)        | 0.9466 ± 0.0029 (3)        |
|                | SMOTE        | 0.9487 ± 0.0026 (2)        | 0.9482 ± 0.0029 (4)        | <b>0.9452 ± 0.0025 (1)</b> | 0.9484 ± 0.0025 (2)        | 0.9469 ± 0.0027 (2)        |
| german         | ERM          | 0.7835 ± 0.0305 (2)        | <b>0.7841 ± 0.0313 (1)</b> | 0.7834 ± 0.0308 (4)        | 0.7831 ± 0.0314 (4)        | 0.7803 ± 0.0324 (3)        |
|                | Plugin       | <b>0.7851 ± 0.0286 (1)</b> | 0.7824 ± 0.0293 (2)        | <b>0.7852 ± 0.0300 (1)</b> | <b>0.7855 ± 0.0298 (1)</b> | <b>0.7840 ± 0.0319 (1)</b> |
|                | Balanced ERM | 0.7835 ± 0.0321 (2)        | 0.7806 ± 0.0304 (3)        | 0.7845 ± 0.0313 (3)        | 0.7840 ± 0.0310 (3)        | 0.7828 ± 0.0317 (2)        |
|                | Undersample  | 0.7787 ± 0.0327 (5)        | 0.7799 ± 0.0254 (4)        | 0.7788 ± 0.0324 (5)        | 0.7809 ± 0.0321 (5)        | 0.7801 ± 0.0270 (5)        |
|                | SMOTE        | 0.7816 ± 0.0279 (4)        | 0.7797 ± 0.0309 (5)        | 0.7850 ± 0.0272 (2)        | 0.7841 ± 0.0282 (2)        | 0.7802 ± 0.0246 (4)        |
| kddcup08       | ERM          | 0.9218 ± 0.0138 (2)        | 0.9128 ± 0.0163 (4)        | 0.8681 ± 0.0150 (5)        | 0.9216 ± 0.0137 (2)        | 0.9083 ± 0.0139 (3)        |
|                | Plugin       | <b>0.9220 ± 0.0112 (1)</b> | <b>0.9161 ± 0.0183 (1)</b> | 0.8720 ± 0.0125 (4)        | <b>0.9230 ± 0.0128 (1)</b> | <b>0.9106 ± 0.0168 (1)</b> |
|                | Balanced ERM | 0.9102 ± 0.0139 (4)        | 0.9136 ± 0.0148 (3)        | 0.9084 ± 0.0133 (2)        | 0.9132 ± 0.0140 (4)        | 0.9073 ± 0.0139 (4)        |
|                | Undersample  | 0.8898 ± 0.0153 (5)        | 0.8867 ± 0.0126 (5)        | 0.8930 ± 0.0120 (3)        | 0.8924 ± 0.0155 (5)        | 0.8844 ± 0.0154 (5)        |
|                | SMOTE        | 0.9153 ± 0.0160 (3)        | 0.9153 ± 0.0169 (2)        | <b>0.9089 ± 0.0122 (1)</b> | 0.9160 ± 0.0154 (3)        | 0.9098 ± 0.0121 (2)        |
| kddcup98       | ERM          | <b>0.6147 ± 0.0076 (1)</b> | <b>0.6148 ± 0.0077 (1)</b> | 0.6145 ± 0.0076 (3)        | 0.6145 ± 0.0076 (2)        | 0.5110 ± 0.0439 (5)        |
|                | Plugin       | <b>0.6147 ± 0.0078 (1)</b> | 0.6145 ± 0.0081 (3)        | 0.6146 ± 0.0077 (2)        | 0.6145 ± 0.0076 (2)        | 0.5328 ± 0.0222 (4)        |
|                | Balanced ERM | 0.6143 ± 0.0077 (3)        | 0.6146 ± 0.0080 (2)        | <b>0.6147 ± 0.0076 (1)</b> | <b>0.6147 ± 0.0077 (1)</b> | 0.6092 ± 0.0071 (3)        |
|                | Undersample  | 0.6142 ± 0.0071 (4)        | 0.6136 ± 0.0070 (4)        | 0.6136 ± 0.0069 (4)        | 0.6136 ± 0.0069 (4)        | <b>0.6096 ± 0.0072 (1)</b> |
|                | SMOTE        | 0.6119 ± 0.0089 (5)        | 0.6124 ± 0.0083 (5)        | 0.6124 ± 0.0089 (5)        | 0.6120 ± 0.0088 (5)        | 0.6094 ± 0.0069 (2)        |
| letter         | ERM          | 0.9866 ± 0.0041 (5)        | 0.9882 ± 0.0023 (3)        | 0.9741 ± 0.0045 (4)        | 0.9864 ± 0.0040 (4)        | 0.9823 ± 0.0061 (4)        |
|                | Plugin       | 0.9867 ± 0.0042 (4)        | <b>0.9883 ± 0.0026 (1)</b> | 0.9741 ± 0.0045 (4)        | 0.9863 ± 0.0043 (5)        | 0.9823 ± 0.0061 (4)        |
|                | Balanced ERM | <b>0.9884 ± 0.0023 (1)</b> | 0.9882 ± 0.0027 (3)        | 0.9847 ± 0.0020 (2)        | <b>0.9883 ± 0.0021 (1)</b> | <b>0.9874 ± 0.0022 (1)</b> |
|                | Undersample  | 0.9877 ± 0.0021 (3)        | 0.9877 ± 0.0022 (5)        | 0.9846 ± 0.0019 (3)        | 0.9876 ± 0.0020 (3)        | 0.9864 ± 0.0022 (3)        |
|                | SMOTE        | <b>0.9884 ± 0.0022 (1)</b> | <b>0.9883 ± 0.0025 (1)</b> | <b>0.9848 ± 0.0020 (1)</b> | <b>0.9883 ± 0.0022 (1)</b> | 0.9870 ± 0.0023 (2)        |
| optdigits      | ERM          | 0.9992 ± 0.0010 (5)        | 0.9992 ± 0.0008 (4)        | <b>0.9997 ± 0.0003 (1)</b> | 0.9992 ± 0.0008 (4)        | 0.9995 ± 0.0005 (3)        |
|                | Plugin       | 0.9995 ± 0.0005 (2)        | 0.9994 ± 0.0006 (2)        | <b>0.9997 ± 0.0003 (1)</b> | 0.9991 ± 0.0008 (5)        | <b>0.9997 ± 0.0004 (1)</b> |
|                | Balanced ERM | 0.9995 ± 0.0006 (2)        | 0.9994 ± 0.0007 (2)        | 0.9996 ± 0.0004 (3)        | 0.9995 ± 0.0007 (2)        | 0.9995 ± 0.0006 (3)        |
|                | Undersample  | 0.9995 ± 0.0006 (2)        | 0.9991 ± 0.0010 (5)        | 0.9996 ± 0.0003 (3)        | 0.9995 ± 0.0007 (2)        | 0.9993 ± 0.0008 (5)        |
|                | SMOTE        | <b>0.9997 ± 0.0002 (1)</b> | <b>0.9995 ± 0.0006 (1)</b> | 0.9996 ± 0.0004 (3)        | <b>0.9997 ± 0.0002 (1)</b> | 0.9996 ± 0.0004 (2)        |
| pendigits      | ERM          | 0.9911 ± 0.0023 (4)        | 0.9900 ± 0.0015 (4)        | 0.9835 ± 0.0032 (5)        | 0.9910 ± 0.0025 (4)        | 0.9892 ± 0.0041 (5)        |
|                | Plugin       | <b>0.9913 ± 0.0021 (1)</b> | 0.9901 ± 0.0016 (2)        | 0.9842 ± 0.0035 (4)        | <b>0.9913 ± 0.0022 (1)</b> | 0.9901 ± 0.0036 (3)        |
|                | Balanced ERM | 0.9912 ± 0.0016 (3)        | 0.9901 ± 0.0016 (2)        | <b>0.9869 ± 0.0026 (1)</b> | 0.9911 ± 0.0015 (2)        | <b>0.9907 ± 0.0016 (1)</b> |
|                | Undersample  | 0.9909 ± 0.0017 (5)        | 0.9895 ± 0.0018 (5)        | 0.9863 ± 0.0028 (3)        | 0.9907 ± 0.0016 (5)        | 0.9901 ± 0.0016 (3)        |
|                | SMOTE        | <b>0.9913 ± 0.0016 (1)</b> | <b>0.9906 ± 0.0015 (1)</b> | 0.9868 ± 0.0025 (2)        | 0.9911 ± 0.0016 (2)        | 0.9905 ± 0.0017 (2)        |
| satimage       | ERM          | <b>0.7754 ± 0.0134 (1)</b> | <b>0.7662 ± 0.0146 (1)</b> | <b>0.7554 ± 0.0117 (1)</b> | <b>0.7742 ± 0.0144 (1)</b> | 0.7197 ± 0.0182 (4)        |
|                | Plugin       | 0.7532 ± 0.0166 (2)        | 0.7275 ± 0.0098 (2)        | 0.7377 ± 0.0107 (2)        | 0.7723 ± 0.0066 (2)        | 0.7154 ± 0.0105 (5)        |
|                | Balanced ERM | 0.7274 ± 0.0098 (3)        | 0.7274 ± 0.0099 (4)        | 0.7291 ± 0.0127 (5)        | 0.7275 ± 0.0098 (5)        | <b>0.7660 ± 0.0111 (1)</b> |
|                | Undersample  | 0.7270 ± 0.0099 (5)        | 0.7269 ± 0.0099 (5)        | 0.7309 ± 0.0162 (4)        | 0.7349 ± 0.0187 (3)        | 0.7350 ± 0.0195 (2)        |
|                | SMOTE        | 0.7274 ± 0.0094 (3)        | 0.7275 ± 0.0094 (2)        | 0.7312 ± 0.0154 (3)        | 0.7341 ± 0.0181 (4)        | 0.7273 ± 0.0095 (3)        |
| segment        | ERM          | <b>0.9999 ± 0.0003 (1)</b> | <b>0.9999 ± 0.0003 (1)</b> | 0.9977 ± 0.0047 (5)        | <b>0.9999 ± 0.0003 (1)</b> | <b>0.9998 ± 0.0006 (1)</b> |
|                | Plugin       | <b>0.9999 ± 0.0003 (1)</b> | <b>0.9999 ± 0.0003 (1)</b> | 0.9979 ± 0.0047 (4)        | <b>0.9999 ± 0.0003 (1)</b> | <b>0.9998 ± 0.0006 (1)</b> |
|                | Balanced ERM | <b>0.9999 ± 0.0003 (1)</b> | <b>0.9999 ± 0.0003 (1)</b> | <b>0.9982 ± 0.0047 (1)</b> | 0.9998 ± 0.0005 (3)        | 0.9994 ± 0.0017 (4)        |
|                | Undersample  | 0.9997 ± 0.0008 (5)        | 0.9997 ± 0.0008 (5)        | <b>0.9982 ± 0.0046 (1)</b> | 0.9997 ± 0.0008 (5)        | 0.9996 ± 0.0011 (3)        |
|                | SMOTE        | <b>0.9999 ± 0.0004 (1)</b> | <b>0.9999 ± 0.0003 (1)</b> | 0.9981 ± 0.0045 (3)        | 0.9998 ± 0.0004 (3)        | 0.9993 ± 0.0021 (5)        |
| shuttle        | ERM          | 0.5813 ± 0.1313 (4)        | <b>0.7525 ± 0.0678 (1)</b> | 0.5667 ± 0.1468 (4)        | 0.5667 ± 0.1468 (4)        | 0.5839 ± 0.1536 (4)        |
|                | Plugin       | 0.5640 ± 0.1076 (5)        | 0.6832 ± 0.1305 (2)        | 0.5586 ± 0.1339 (5)        | 0.5586 ± 0.1339 (5)        | 0.5698 ± 0.1477 (5)        |
|                | Balanced ERM | 0.6729 ± 0.1217 (2)        | 0.6826 ± 0.1268 (3)        | 0.6628 ± 0.1633 (2)        | <b>0.6961 ± 0.1351 (1)</b> | <b>0.7091 ± 0.1098 (1)</b> |
|                | Undersample  | <b>0.6745 ± 0.1388 (1)</b> | 0.6734 ± 0.1412 (4)        | <b>0.6816 ± 0.1360 (1)</b> | 0.6751 ± 0.1376 (2)        | 0.6754 ± 0.1490 (2)        |
|                | SMOTE        | 0.6292 ± 0.1145 (3)        | 0.6311 ± 0.1405 (5)        | 0.6424 ± 0.1488 (3)        | 0.6415 ± 0.1480 (3)        | 0.6689 ± 0.1475 (3)        |
| spambase       | ERM          | 0.9714 ± 0.0047 (2)        | <b>0.9697 ± 0.0046 (1)</b> | 0.9507 ± 0.0065 (4)        | <b>0.9712 ± 0.0048 (1)</b> | 0.9716 ± 0.0053 (2)        |
|                | Plugin       | 0.9713 ± 0.0046 (4)        | 0.9694 ± 0.0044 (3)        | 0.9505 ± 0.0063 (5)        | 0.9709 ± 0.0047 (3)        | 0.9711 ± 0.0055 (3)        |
|                | Balanced ERM | <b>0.9718 ± 0.0048 (1)</b> | 0.9694 ± 0.0044 (3)        | 0.9517 ± 0.0061 (3)        | <b>0.9712 ± 0.0043 (1)</b> | 0.9707 ± 0.0051 (4)        |
|                | Undersample  | 0.9709 ± 0.0049 (5)        | 0.9688 ± 0.0048 (5)        | <b>0.9518 ± 0.0064 (1)</b> | 0.9706 ± 0.0046 (5)        | 0.9706 ± 0.0055 (5)        |
|                | SMOTE        | 0.9714 ± 0.0046 (2)        | 0.9695 ± 0.0045 (2)        | <b>0.9518 ± 0.0062 (1)</b> | 0.9709 ± 0.0041 (3)        | <b>0.9718 ± 0.0049 (1)</b> |
| splice         | ERM          | <b>0.9939 ± 0.0027 (1)</b> | 0.9931 ± 0.0030 (4)        | 0.9935 ± 0.0031 (4)        | 0.9938 ± 0.0028 (3)        | 0.9934 ± 0.0032 (4)        |
|                | Plugin       | 0.9932 ± 0.0030 (4)        | <b>0.9935 ± 0.0028 (1)</b> | 0.9933 ± 0.0024 (5)        | 0.9924 ± 0.0030 (5)        | 0.9937 ± 0.0029 (3)        |
|                | Balanced ERM | 0.9938 ± 0.0025 (2)        | <b>0.9935 ± 0.0028 (1)</b> | <b>0.9944 ± 0.0025 (1)</b> | 0.9939 ± 0.0029 (2)        | 0.9934 ± 0.0037 (4)        |
|                | Undersample  | 0.9932 ± 0.0033 (4)        | 0.9929 ± 0.0030 (5)        | 0.9939 ± 0.0026 (3)        | 0.9938 ± 0.0028 (3)        | 0.9939 ± 0.0029 (2)        |
|                | SMOTE        | 0.9938 ± 0.0026 (2)        | 0.9934 ± 0.0026 (3)        | 0.9941 ± 0.0025 (2)        | <b>0.9941 ± 0.0027 (1)</b> | <b>0.9943 ± 0.0027 (1)</b> |
| thyroid        | ERM          | 0.9925 ± 0.0107 (4)        | 0.9893 ± 0.0131 (5)        | <b>0.9957 ± 0.0010 (1)</b> | 0.9947 ± 0.0052 (4)        | 0.9960 ± 0.0022 (2)        |
|                | Plugin       | 0.9922 ± 0.0105 (5)        | 0.9953 ± 0.0034 (2)        | <b>0.9957 ± 0.0010 (1)</b> | 0.9945 ± 0.0052 (5)        | <b>0.9973 ± 0.0008 (1)</b> |
|                | Balanced ERM | <b>0.9961 ± 0.0022 (1)</b> | 0.9951 ± 0.0036 (3)        | 0.9941 ± 0.0026 (4)        | 0.9958 ± 0.0021 (2)        | 0.9959 ± 0.0036 (3)        |
|                | Undersample  | 0.9952 ± 0.0031 (3)        | 0.9949 ± 0.0032 (4)        | 0.9918 ± 0.0038 (5)        | 0.9955 ± 0.0031 (3)        | 0.9953 ± 0.0029 (5)        |
|                | SMOTE        | <b>0.9961 ± 0.0019 (1)</b> | <b>0.9956 ± 0.0025 (1)</b> | 0.9943 ± 0.0026 (3)        | <b>0.9959 ± 0.0018 (1)</b> | 0.9958 ± 0.0021 (4)        |
